# Supplementary material for: Investigations on the Impact of a Series of Alkoxysilane Precursors on the Structure, Morphology and Wettability of an Established Zirconium-Modified Hybrid Anticorrosion Sol–Gel Coating
Source: MDPI journal article supplement (doi:10.3390/gels10050315), 2024-05-05
Supplement: s1 [file s1]

### Electronic Supplementary Information's (ESI)

**Figure S1.** Variation of the maximum particle size versus the concentration of silane modifier.

**Figure S2.** AFM images of 5% silane modified coatings cured at 100, 130 and 150 °C.

**Figure S3.** A scheme describing the four steps of the preparation of the reference hybrid sol-gel material by MacHugh, et al., 2019 [29].

**Table S1.** Material formulations for functionalised alkoxysilane at various concentrations (1.0-20 mol. %) against the methoxy groups of the MAPTMS.

Figure S1. Variation of the maximum particle size versus the concentration of silane modifier.

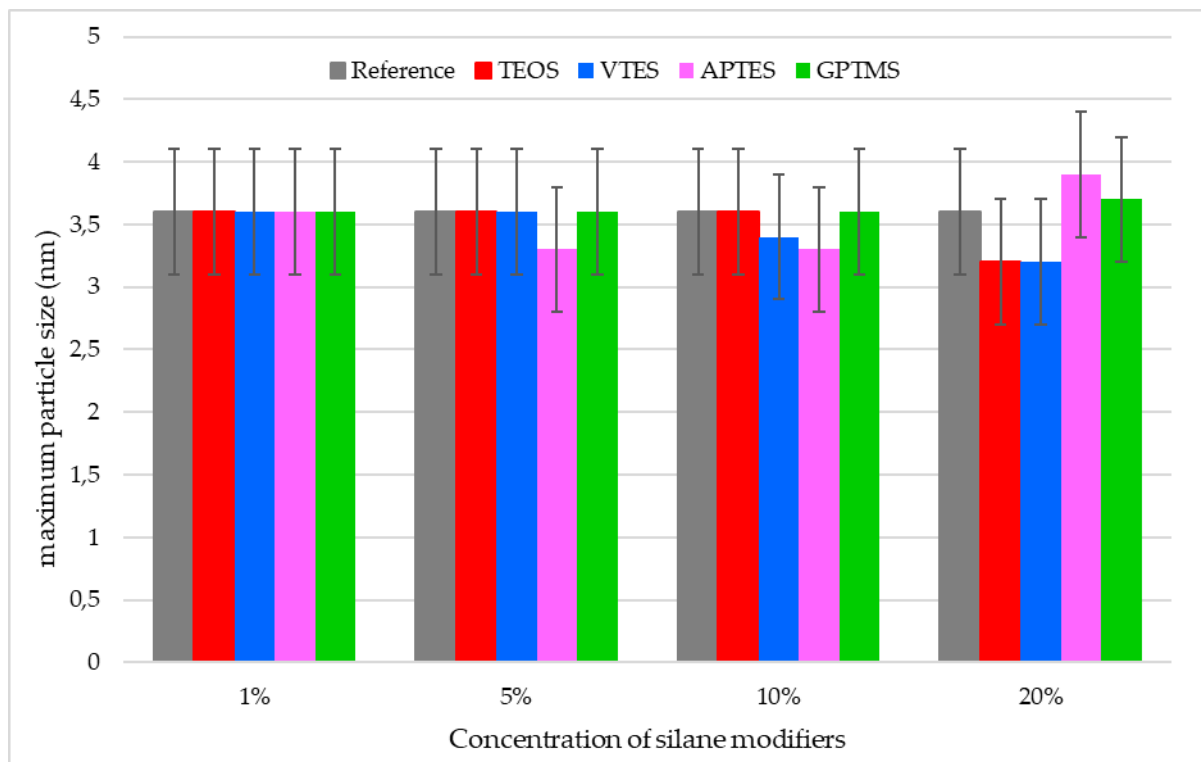

**Figure S2.** AFM images of 5% silane modified coatings cured at 100, 130 and 150 °C.

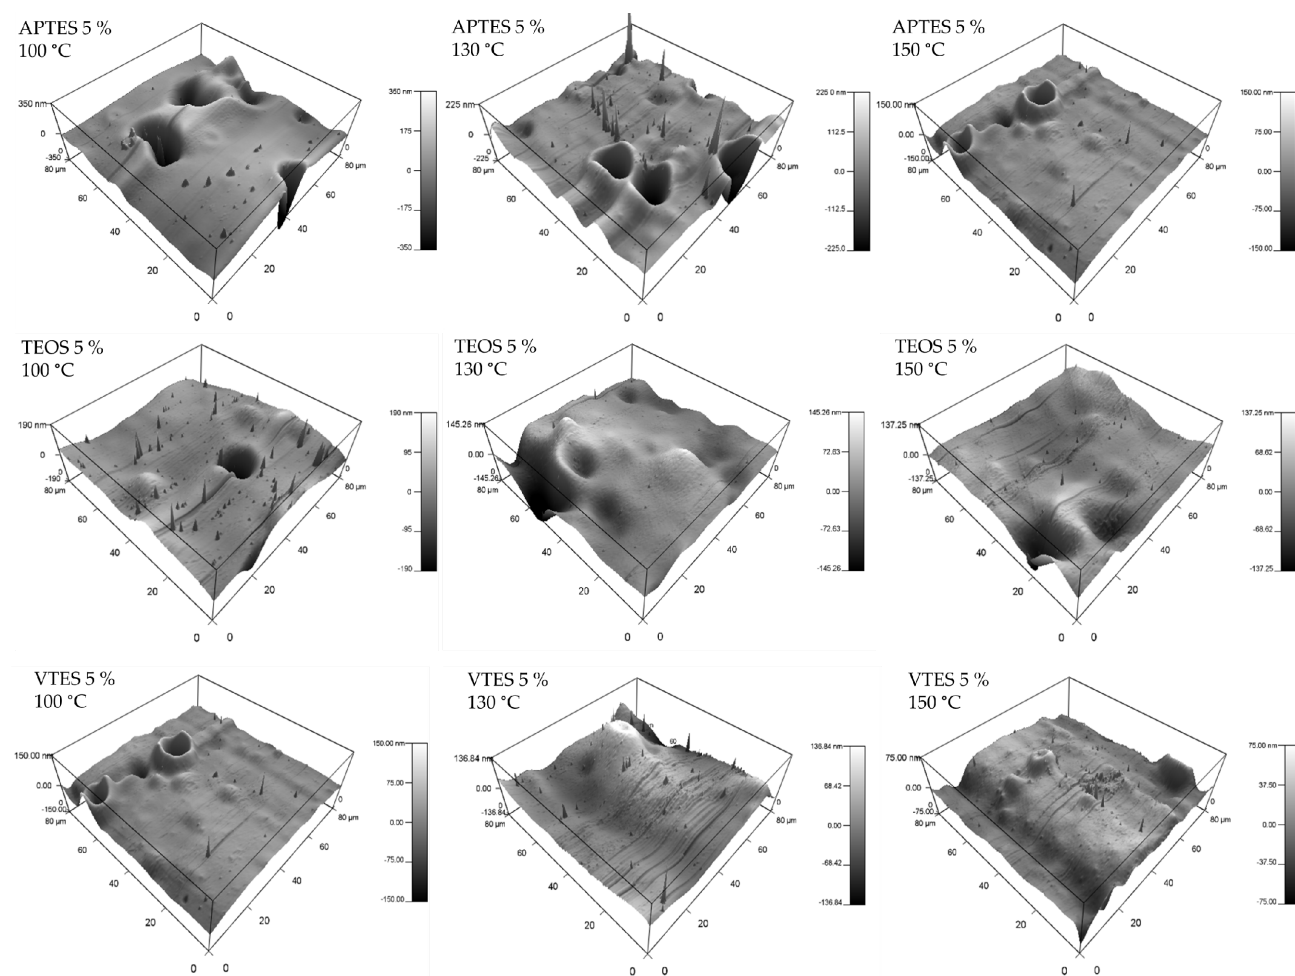

**Figure S3.** A scheme describing the four steps of the preparation of the reference hybrid sol-gel material by MacHugh, et al., 2019 [29].

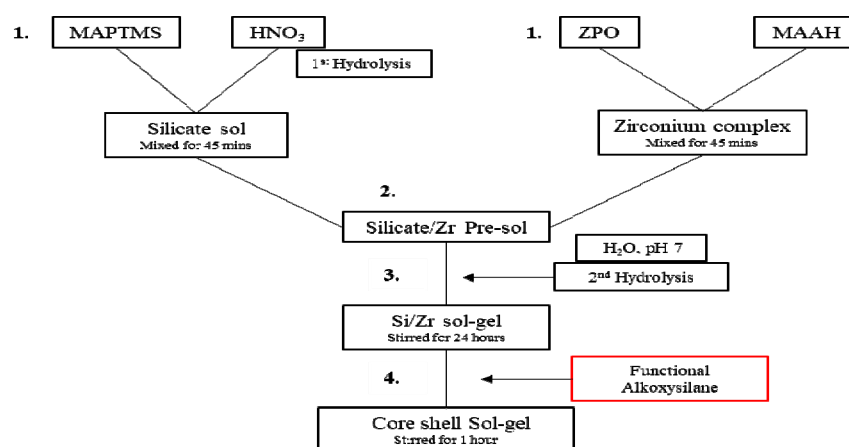

**Table S1.** Material formulations for functionalised alkoxysilane at various concentrations (1.0-20 mol. %) against the methoxy groups of the MAPTMS

| Functional Alkoxysilane | Concentration (mol. %) |
|-------------------------|------------------------|
| APTES                   | 1                      |
| APTES                   | 5                      |
| APTES                   | 10                     |
| APTES                   | 20                     |
| GPTMS                   | 1                      |
| GPTMS                   | 5                      |
| GPTMS                   | 10                     |
| GPTMS                   | 20                     |
| TEOS                    | 1                      |
| TEOS                    | 5                      |
| TEOS                    | 10                     |
| TEOS                    | 20                     |
| VTES                    | 1                      |
| VTES                    | 5                      |
| VTES                    | 10                     |
| VTES                    | 20                     |
